# Supplementary material for: A genomic view of experimental intraspecies and interspecies transformation of a rifampicin-resistance allele into Neisseria meningitidis
Source: PubMed Central journal article supplement (PMC6321871; doi:10.1099/mgen.0.000222), 2018-09-25
Supplement: mgen-4-222-s001.pdf [file mgen-4-222-s001.pdf]

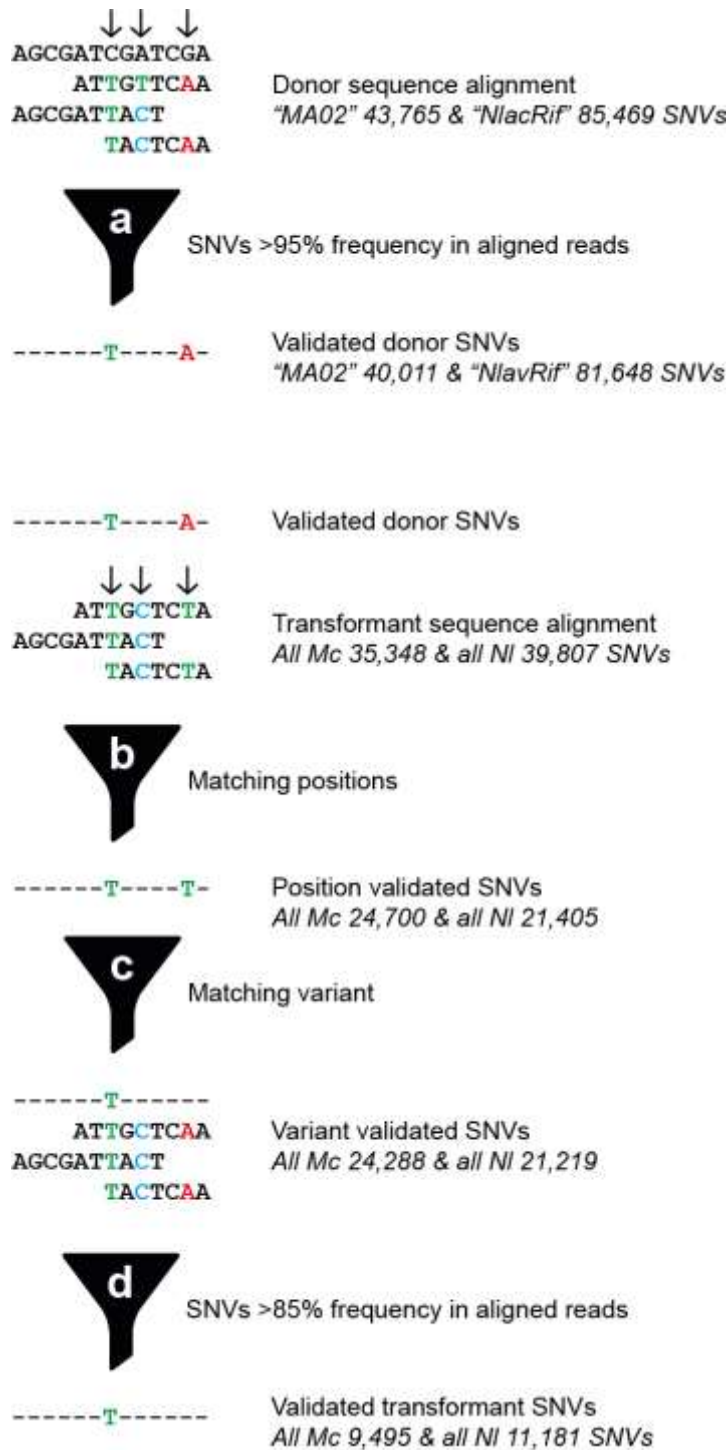

**Figure S1** - Cross-validation and SNV calling scheme. Donor sequence reads were aligned against the consensus reference sequence - SNVs found presented in less than 95% of the reads were excluded (a). SNVs identified for each transformant sample aligned against the consensus sequence was matched to the donor validated SNVs for positions (b) and same nucleotide variant (c). Finally, the SNVs matching the donor positions and nucleotide variants were filtered by excluding SNVs found in less than 85% of the aligned reads (d). Numbers in italics indicate the number of SNVs for the two donors Mc "MA02" and NI "NlacRif" (top), and all combined Mc and NI transformants (bottom).

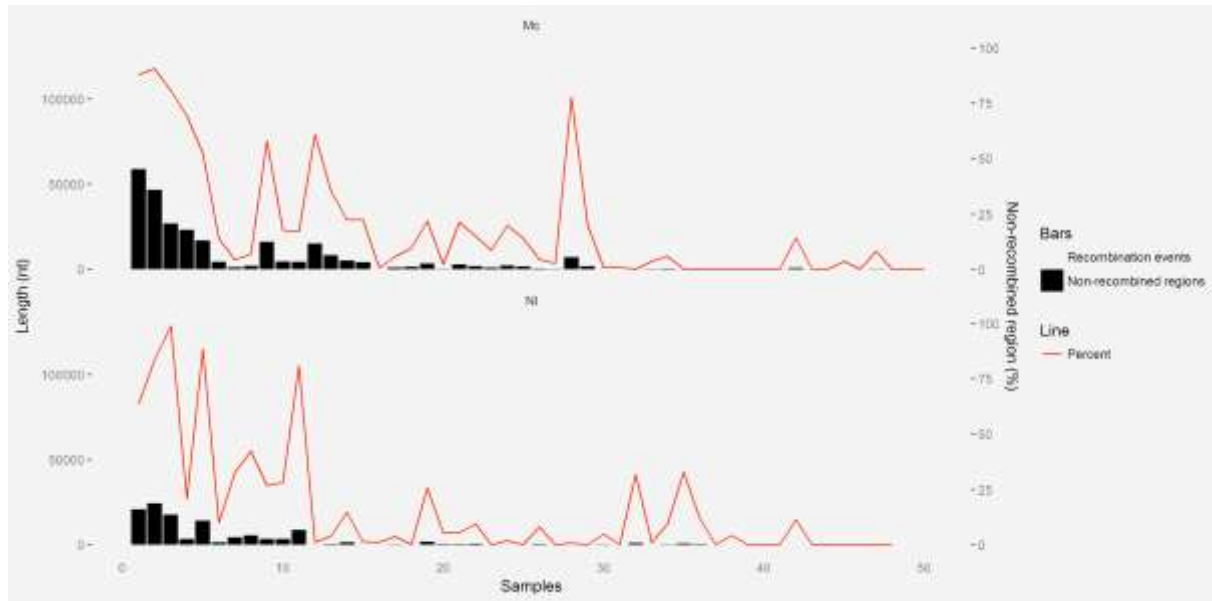

**Figure S2** – Bars represent length (nt – left axis) of recombination event size and combined size of all non-recombined regions for each sample (x-axis) for the Mc donor (top) and the NI donor (bottom), line represents percent (% - right axis) non-recombined regions out of recombination event length.

**Table S1** - Primers used to check for spontaneous mutation and primers used for the 412 nt construct made using NI isolate 020-06 as template and transformed into NI Z6793 Rif<sup>R</sup> (the NI donor)

| <b>Primers</b> | <b>Description</b>                                  | <b>Primer sequence</b>                         | <b>Reference</b>         |
|----------------|-----------------------------------------------------|------------------------------------------------|--------------------------|
| NmB9F/NmB24R   | Mc <i>rpoB</i> mutation PCR & sequencing            | GATTAATGCAAAACCTGT/<br>AAACGCCTGAAGGTCCGAA     | <i>Nolte et al. 2003</i> |
| JEE40/JEE43    | NI Rif <sup>R</sup> construct 1/2, PCR & sequencing | ATCCGAAAACCTTGATGCCG/<br>CCCATGTCTGAAGTAACC    | <i>This study</i>        |
| JEE41/JEE44    | NI Rif <sup>R</sup> construct 2/2, PCR & sequencing | ATAAACGCCGTGTATCTG/<br>ACCGAAGAAATCGATTACTTGTC | <i>This study</i>        |

**Table S2** - Summary of the isolates and samples included, spontaneous Rif<sup>R</sup> mutation frequency and Rif<sup>R</sup> transformation frequency, the number of experimental samples sequenced, number of reads and sequence coverage

|                                                                           | Number of samples/parallels | Average spontaneous Rif <sup>R</sup> frequency cfu <sup>-1</sup> † | Average # of reads* | Average coverage** |
|---------------------------------------------------------------------------|-----------------------------|--------------------------------------------------------------------|---------------------|--------------------|
| Recipient <i>N. meningitidis</i> MC58 ( <i>model strain</i> )             | 1                           | 6.9E-9                                                             | 22273 / 353573      | 227                |
| Donor <i>N. meningitidis</i> FAM18 Rif <sup>R</sup> ( <i>this study</i> ) | 1                           | 3.6E-8                                                             | 34509 / 172278      | 518                |
| Donor <i>N. lactamica</i> Z6793 Rif <sup>R</sup> ( <i>this study</i> )    | 1                           | N/A                                                                | 21309 / 581072      | 374                |
|                                                                           |                             | Average transformation frequency cfu <sup>-1</sup> †               |                     |                    |
| MC58 (recipient) + FAM18 Rif <sup>R</sup> (Mc donor)                      | 50                          | 7.3E-6                                                             | 34030 / 168447      | 225 (28-1455)      |
| MC58 (recipient) + Z6793 Rif <sup>R</sup> (NI donor)                      | 48                          | 1.2E-4                                                             | 33943 / 198375      | 245 (96-647)       |

† Average of 3 replicates – transformation set-up like described in the materials and methods. cfu = colony forming units.

\* Average number of reads from the first sequencing effort using MiSeq 2x150 bp (v2) and second sequencing effort using MiSeq 2x300 bp (v3).

\*\* Average coverage for the recipient is calculated at the third step following Spades and Contiguator assemblies, average coverage for the donor and sample sequences is shown for the sequence alignment against the recipient consensus – range of coverage for all samples shown in parenthesis. A single sample was found with <30× average coverage (sample “M01”).

**Table S3** – SNVs outside the 100 kb region surrounding Rif<sup>R</sup>

| <b>Sample name*</b> | <b>Number of excluded SNVs</b> | <b>Positions in consensus sequence ("MA02")</b>                    |
|---------------------|--------------------------------|--------------------------------------------------------------------|
| M1                  | 2+6                            | 50545, 50653; 1663244, 1663250, 1663252, 1663257, 1663258, 1663264 |
| M14                 | 2                              | 9814, 9832                                                         |
| M23                 | 2                              | 9814, 9832                                                         |
| M32                 | 2                              | 9814, 9832                                                         |
| L28                 | 1                              | 1105390                                                            |

\* M and L represent Mc and NI donor transformants respectively.
